# Supplementary material for: Ligand influence versus electronic configuration of d-metal ion in determining the fate of NIR emission from LnIII ions: a case study with CuII, NiII and ZnII complexes
Source: Royal Society of Chemistry journal article supplement (doi:10.1039/d0nj04020g), 2020-12-28
Supplement: d0nj04020g1.pdf [file d0nj04020g1.pdf]

## Electronic Supplementary Information

# Ligand Influence Versus Electronic Configuration of d-metal Ion in Determining the Fate of NIR Emission from Ln<sup>III</sup> Ions: A Case Study with Cu<sup>II</sup>, Ni<sup>II</sup> and Zn<sup>II</sup> Complexes.

Abhineet Verma, <sup>[a, b]</sup> SK Saddam Hossain, <sup>[c]</sup> Sailaja S. Sunkari\*, <sup>[b]</sup> Joseph Reibenspies <sup>[d]</sup>, and Satyen Saha\*<sup>[a]</sup>

[a] Dr. Satyen, Saha, Department of Chemistry, Institute of Science, Banaras Hindu University, Varanasi, India. E-mail: [satyen.saha@gmail.com](mailto:satyen.saha@gmail.com)

[b] Dr. Sailaja S., Sunkari Department of Chemistry, Mahila Maha Vidyalaya, Banaras Hindu University, Varanasi, India. E-mail: [sunkari.s7@gmail.com](mailto:sunkari.s7@gmail.com)

[c] School of Chemistry, University of Hyderabad, Hyderabad, India,

[d] Dr. Joseph H. Reibenspies, Associate Director of X-ray Diffraction Laboratory, Department of Chemistry, Texas A & M University, USA.. E-mail: [reibenspies@chem.tamu.edu](mailto:reibenspies@chem.tamu.edu)

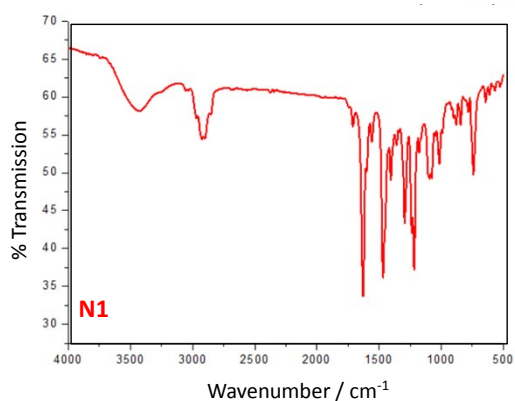

(a)

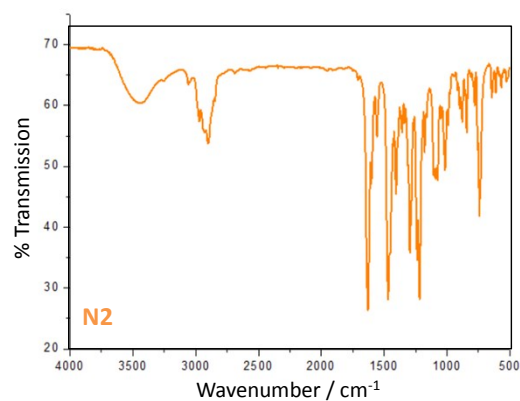

(b)

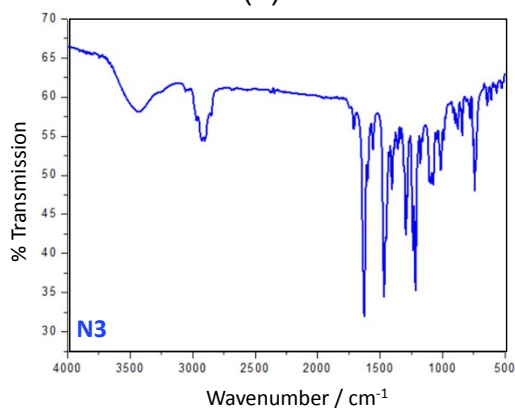

(c)

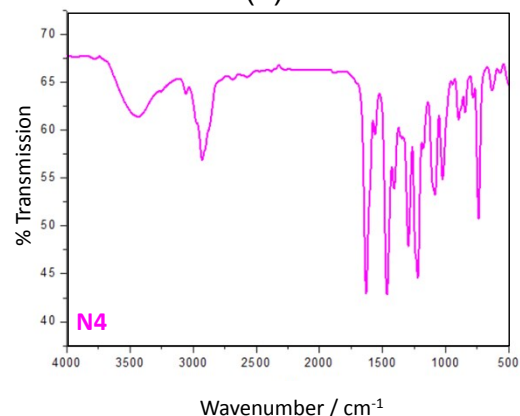

(d)

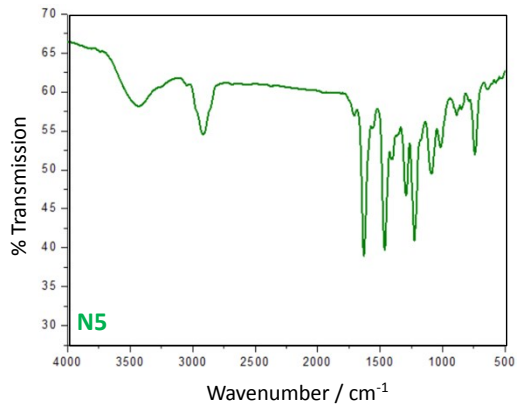

(e)

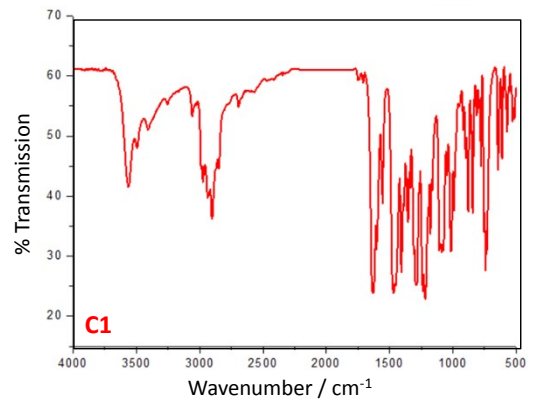

(f)

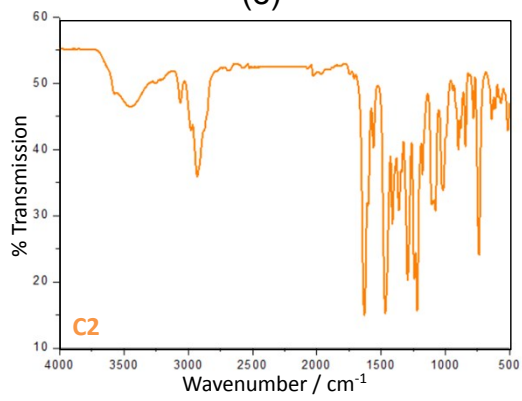

(g)

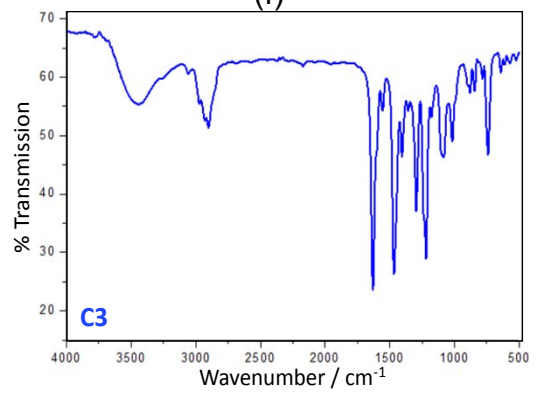

(h)

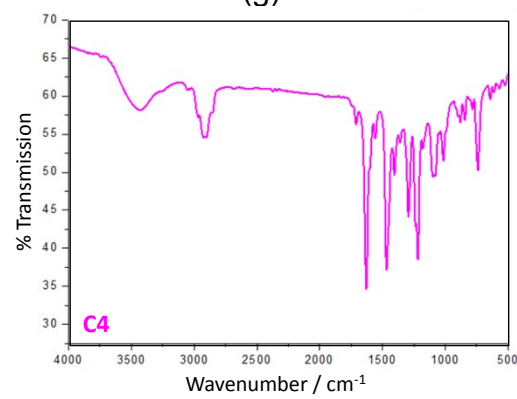

(i)

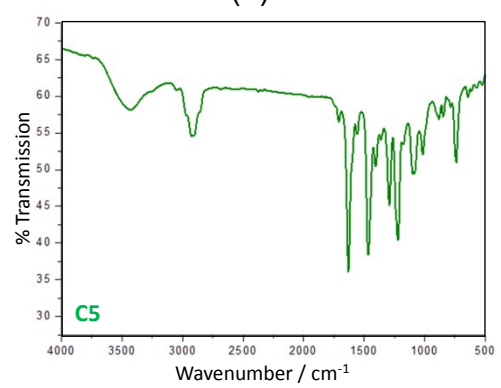

(j)

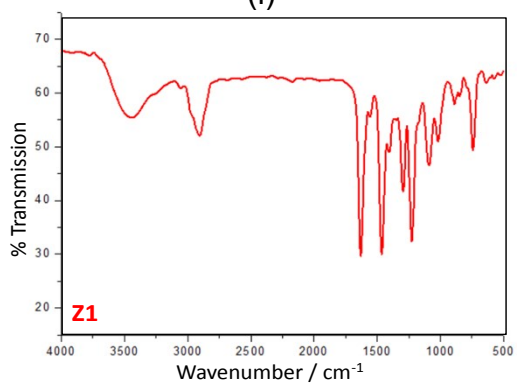

(k)

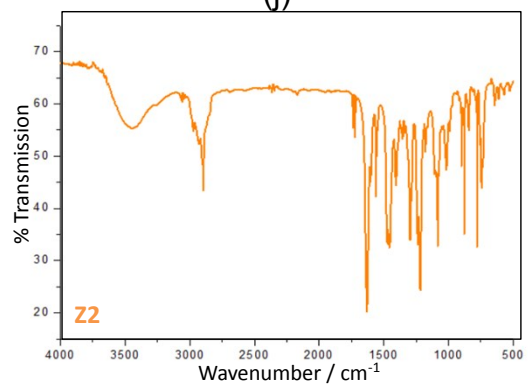

(l)

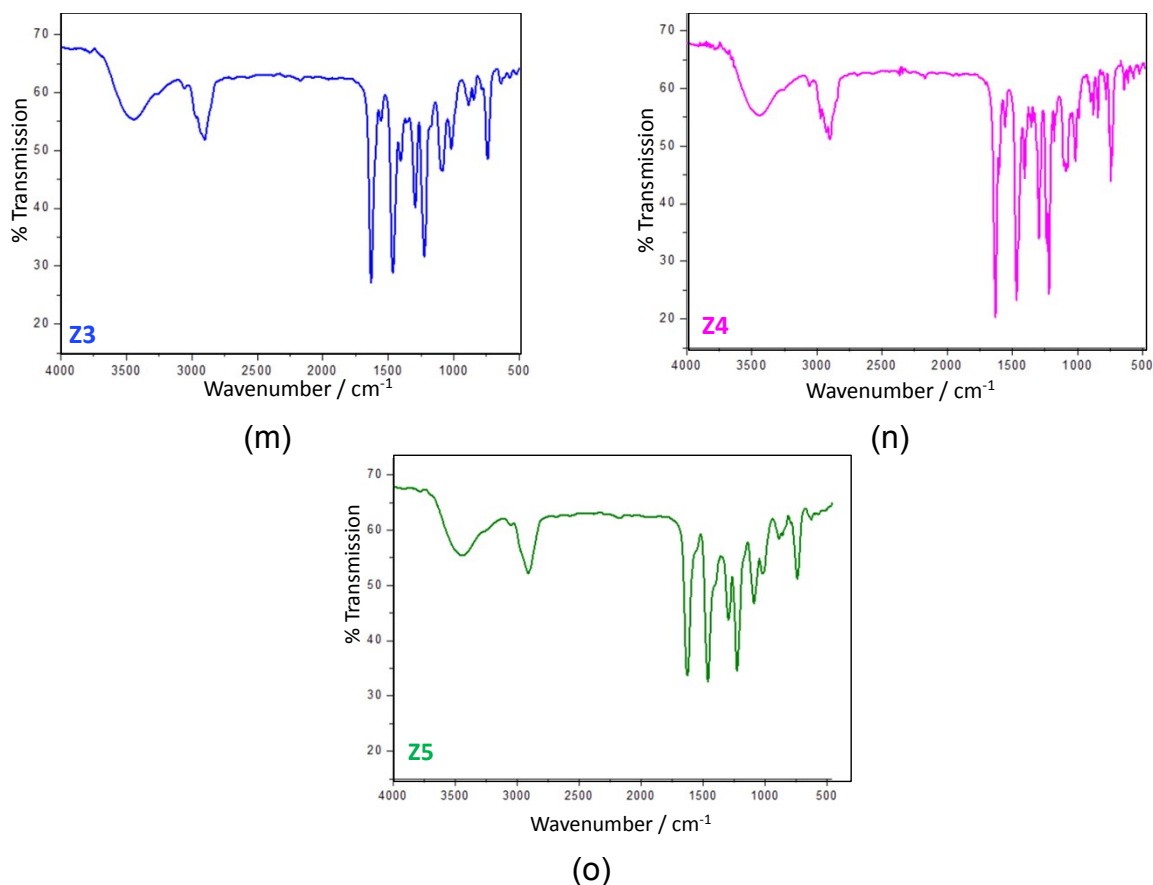

**Figure S1.** FT-IR spectra (a-e) for [L-Ni-Ln], (f-j) for [L-Cu-Ln] and (k-o) for [L-Zn-Ln] complexes.

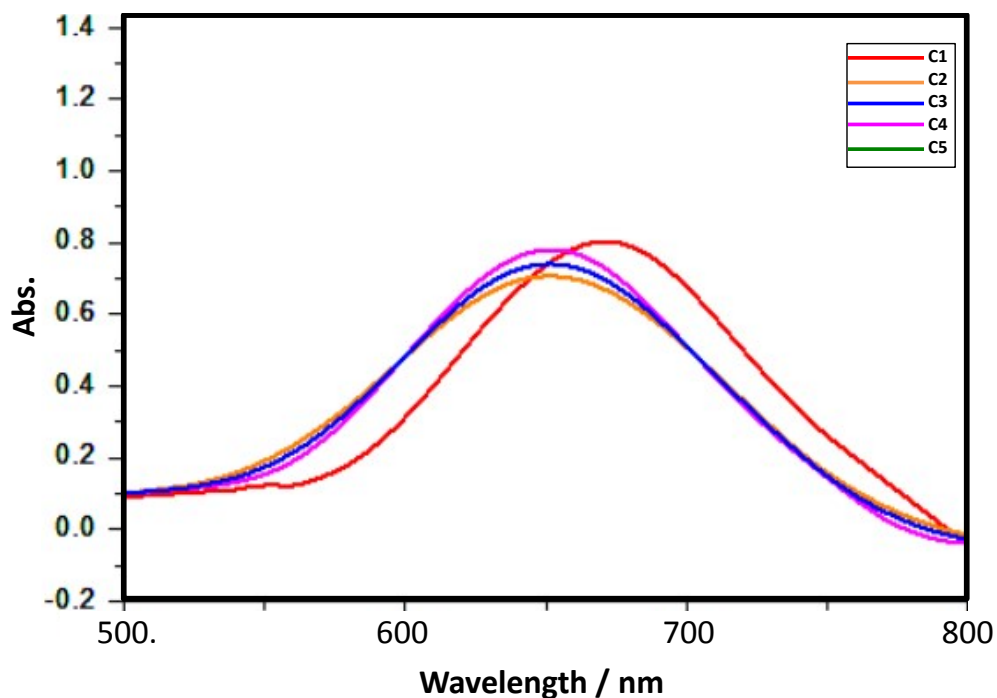

**Figure S2.** UV-Visible spectra for [L-Cu-Ln] complexes at higher concentration ( $\sim 2 \times 10^{-4}$  M)



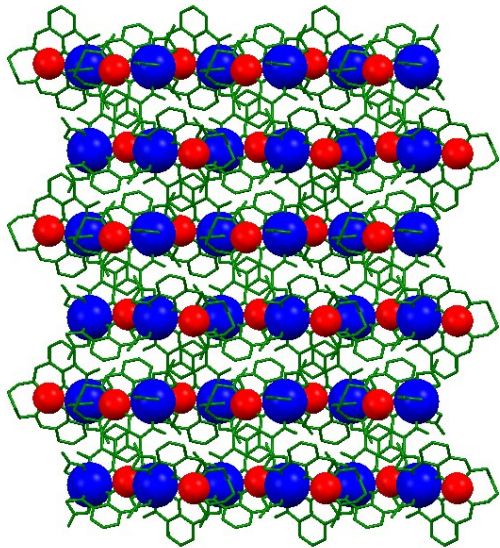

(a)

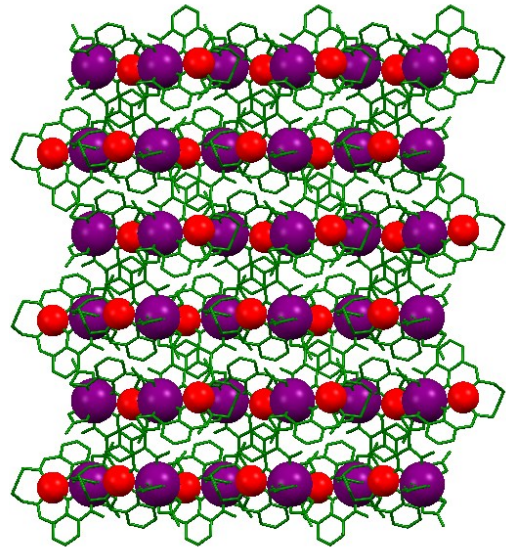

(b)

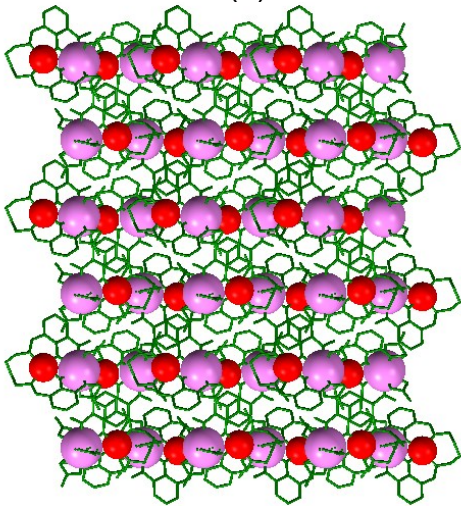

(c)

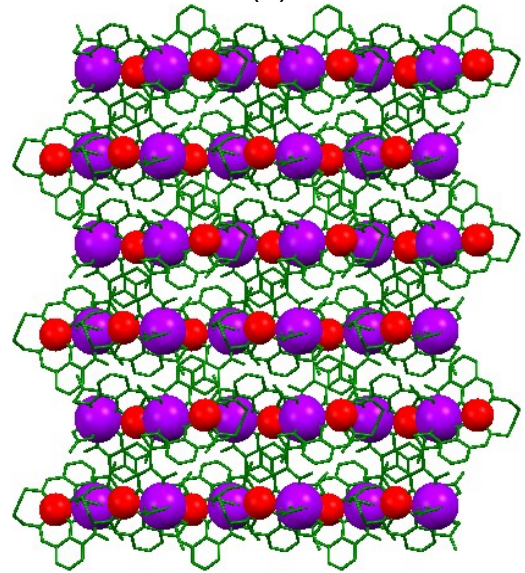

(d)

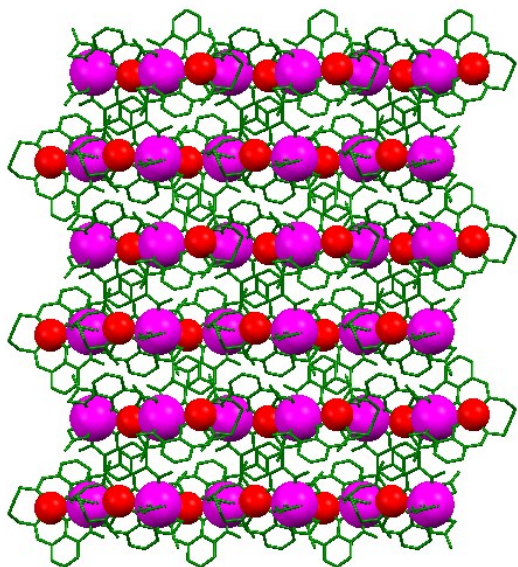

(e)

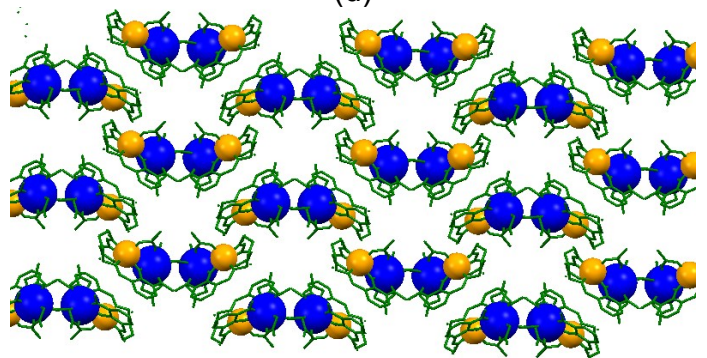

(f)



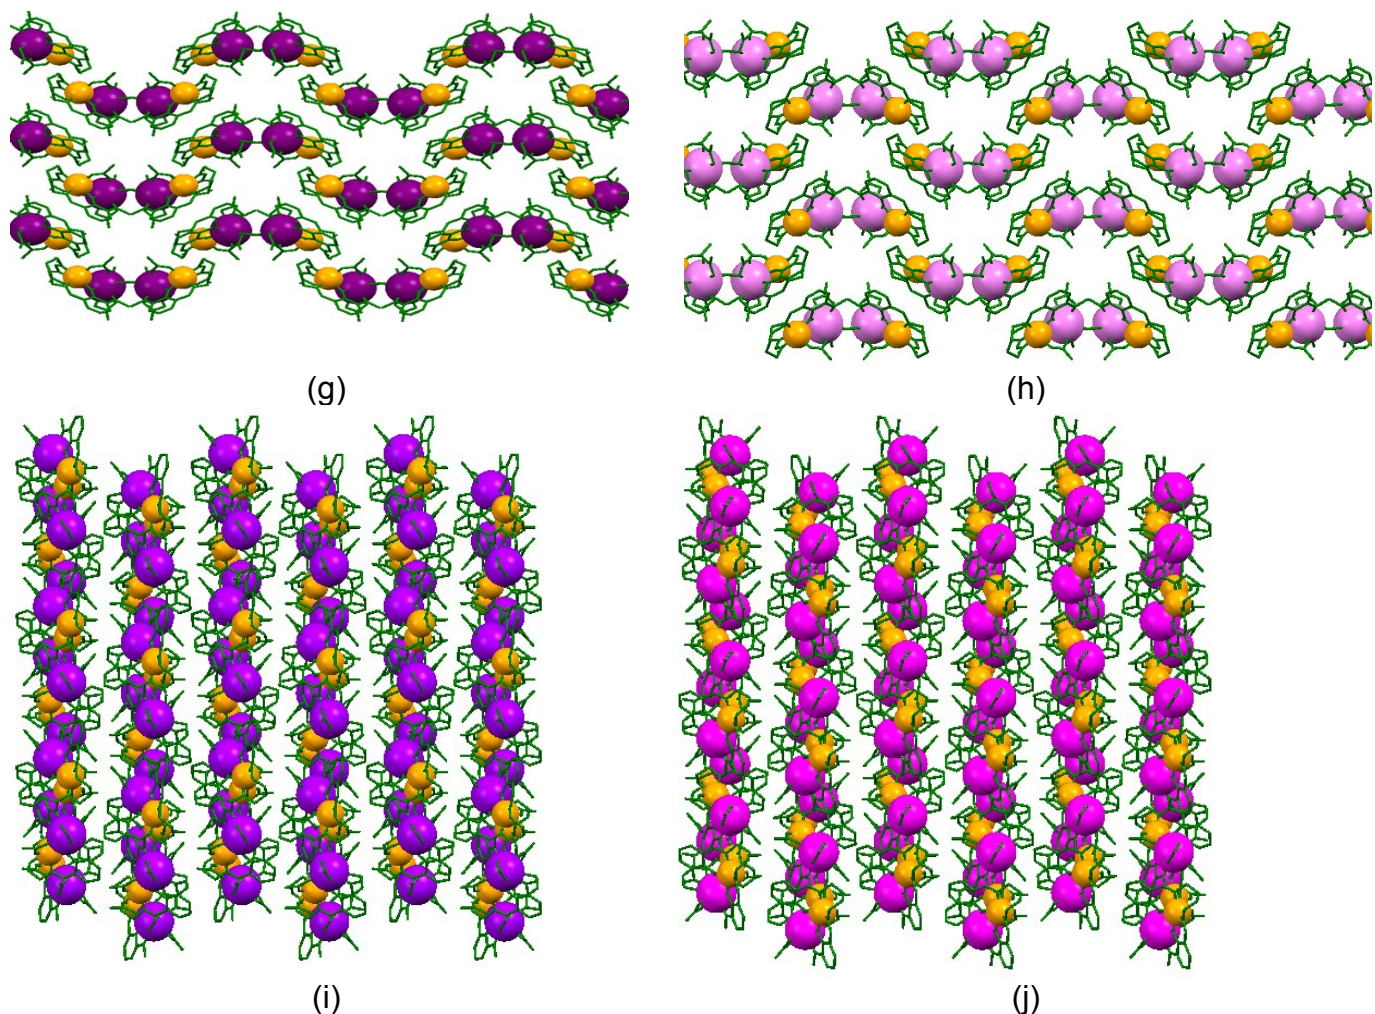

**Figure S3.** Packing diagram for [L-Cu-Ln] complexes (a) [C1]; (b) [C2]; (c) [C3]; (d) [C4]; (e) [C5] and for [L-Zn-Ln] complexes (f) [Z1]; (g) [Z2]; (h) [Z3]; (i) [Z4]; (j) [Z5] down the b-axis.

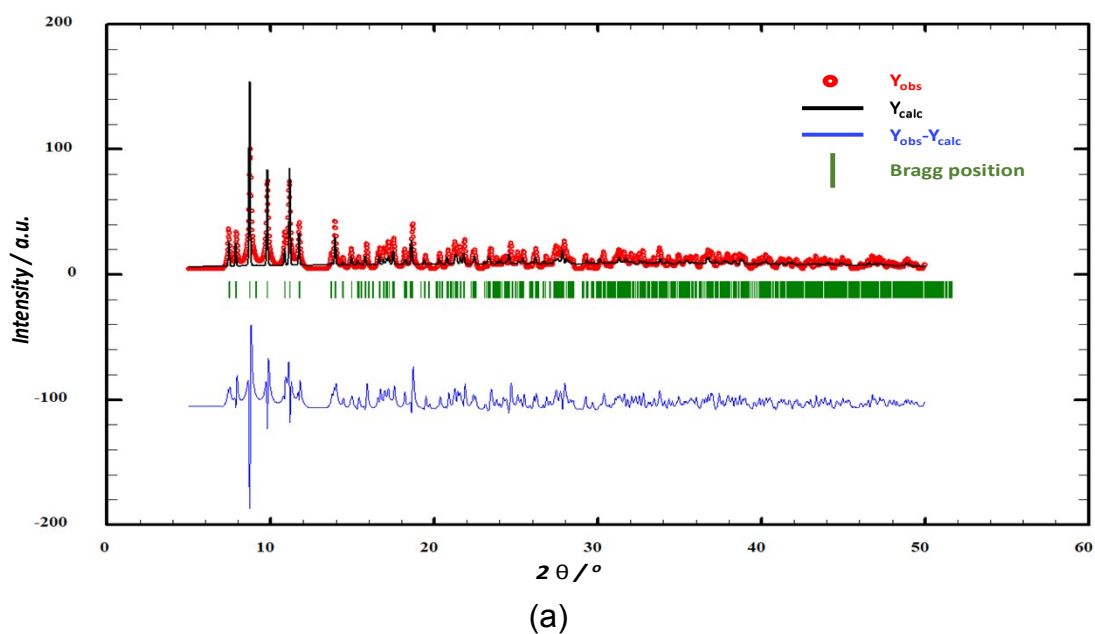

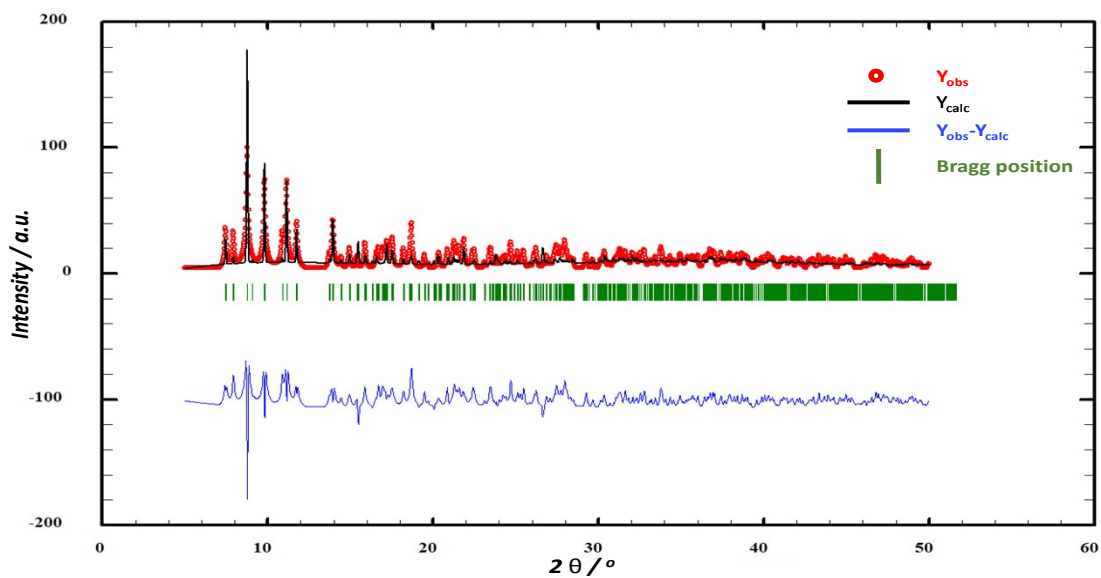

(b)

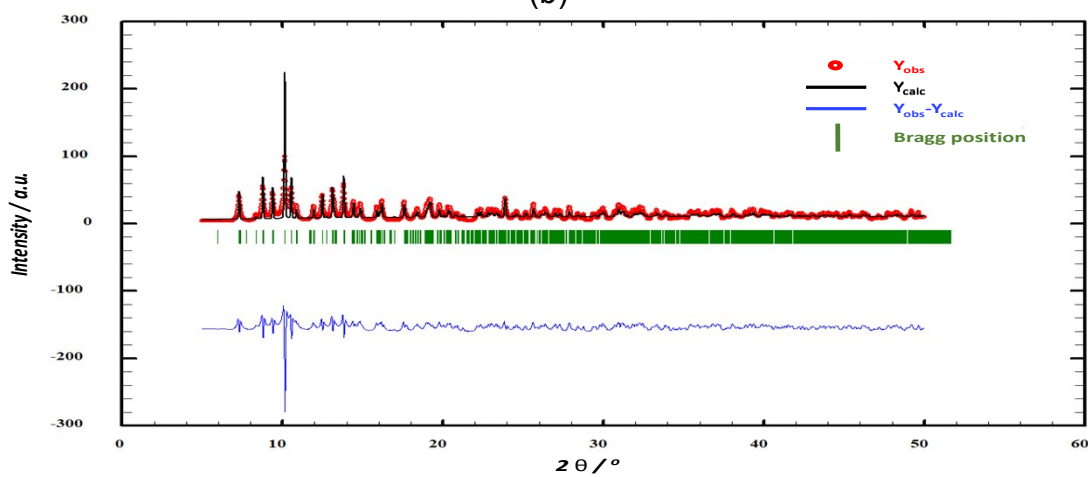

(c)

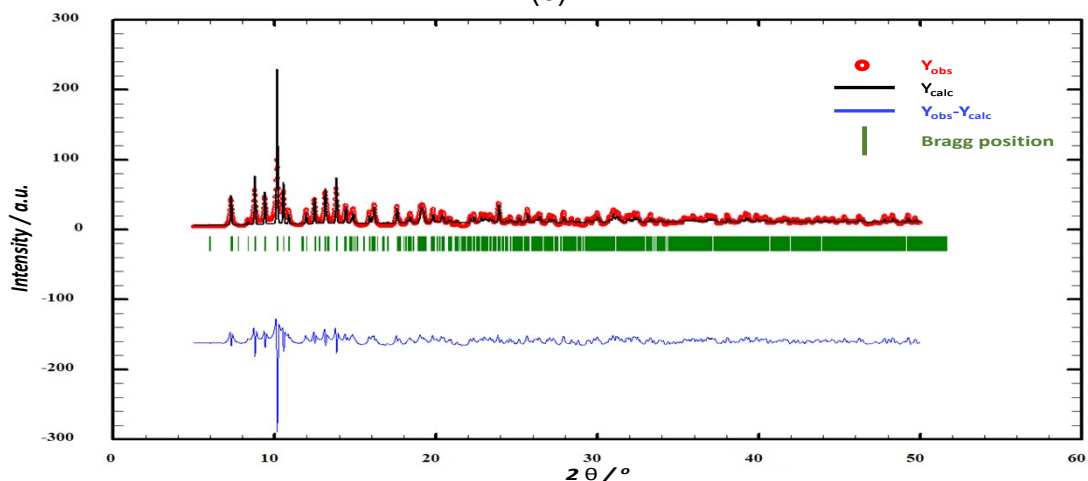

(d)

**Figure S4.** Rietveld refined PXRD patterns for the [L-Ni-Ln] complexes (a to d for [N2] to [N5] respectively). [N1] is discussed in the main manuscript. The red dots represent experimental points, and the solid black line represents Rietveld refined data. The bottom blue line shows the difference between the experimental and refined data. The marked  $2\theta$  positions are the allowed

Bragg peaks.

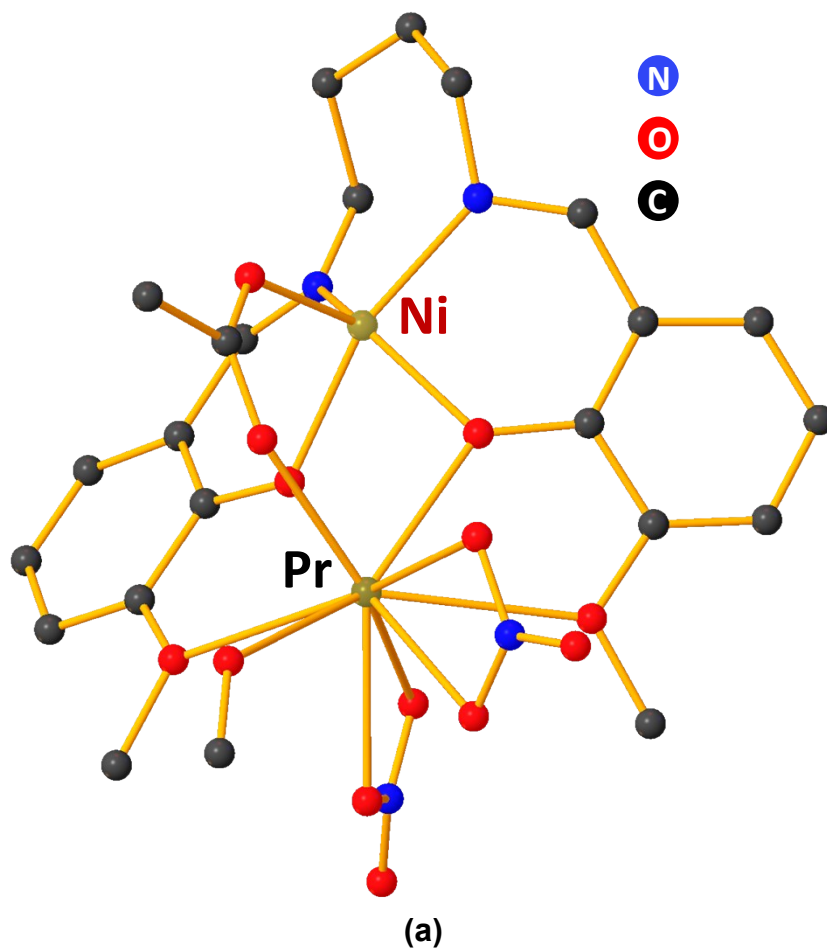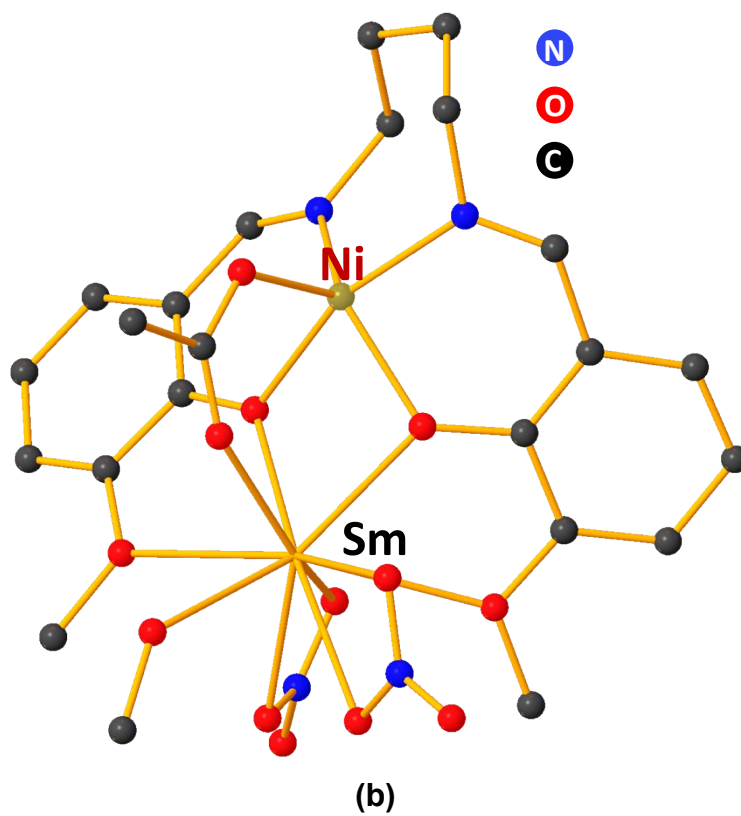

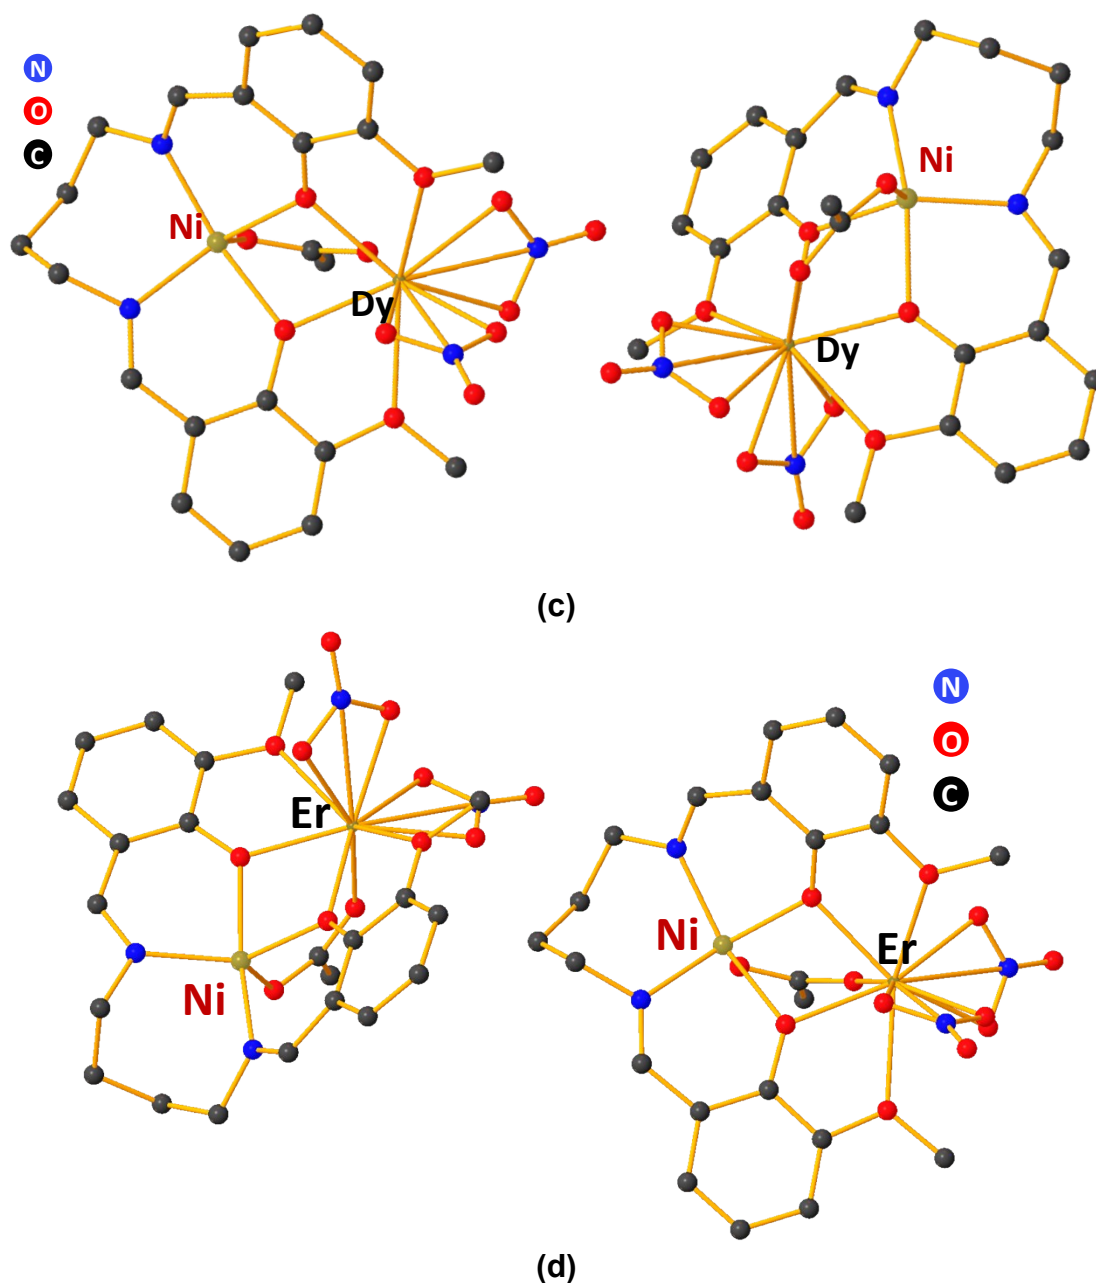

**Figure S5.** The structures generated from Rietveld refinement using experimental PXRD patterns of the [L-Ni-Ln] complexes. (a) [L-Ni-Pr], [N2]; (b) [L-Ni-Sm], [N3]; (c) [L-Ni-Dy], [N4]; (d) [L-Ni-Er], [N5].

| Complexes | a (Å) | b (Å) | c (Å) | $\alpha$ (°) | $\beta$ (°) | $\gamma$ (°) | $\chi^2$ | $R_{\text{exp}}$ | R-Factor | $D_{\text{w-Stat.}}$ | $R_{\text{wp}}$ | $R_{\text{p}}$ |
|-----------|-------|-------|-------|--------------|-------------|--------------|----------|------------------|----------|----------------------|-----------------|----------------|
| [N1]      | 12.01 | 23.69 | 11.50 | 90.0         | 111.88      | 90.0         | 1.27     | 29.7             | 27.5     | 0.1025               | 66.7            | 78.9           |
| [N2]      | 12.11 | 23.72 | 11.48 | 90.0         | 112.0       | 90.0         | 1.73     | 29.7             | 32.8     | 0.0993               | 78.7            | 100            |
| [N3]      | 11.43 | 23.79 | 11.89 | 90.0         | 111.80      | 90.0         | 1.33     | 29.8             | 28.4     | 0.0983               | 67.6            | 81.4           |
| [N4]      | 17.83 | 15.14 | 20.58 | 90.0         | 102.11      | 90.0         | 1.28     | 27.1             | 24.0     | 0.1084               | 63.4            | 70.3           |
| [N5]      | 17.80 | 15.13 | 20.60 | 90.0         | 102.02      | 90.0         | 1.29     | 26.8             | 23.9     | 0.1062               | 63.2            | 70.5           |
